# Supplementary material
Source: PubMed Central journal article supplement (PMC3784215)
Supplement: cei0174-0073-SD1.pdf [file cei0174-0073-SD1.pdf]

CA 12151  
19 pi, 1 usi.  
Centra-de-a

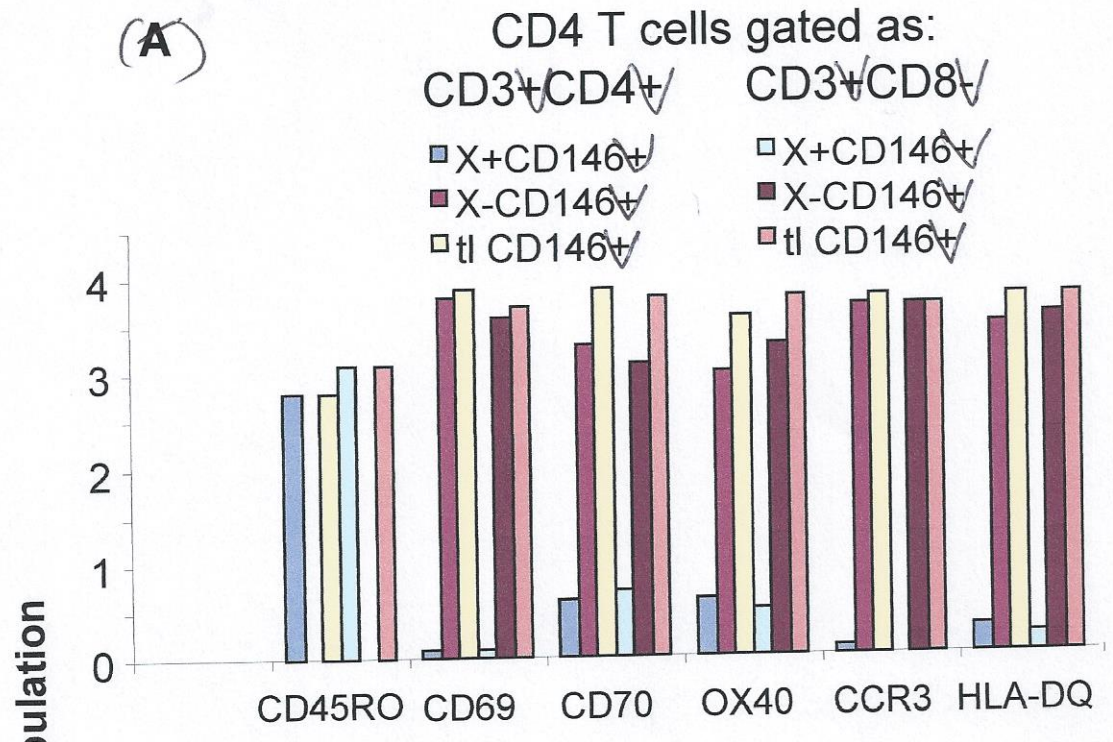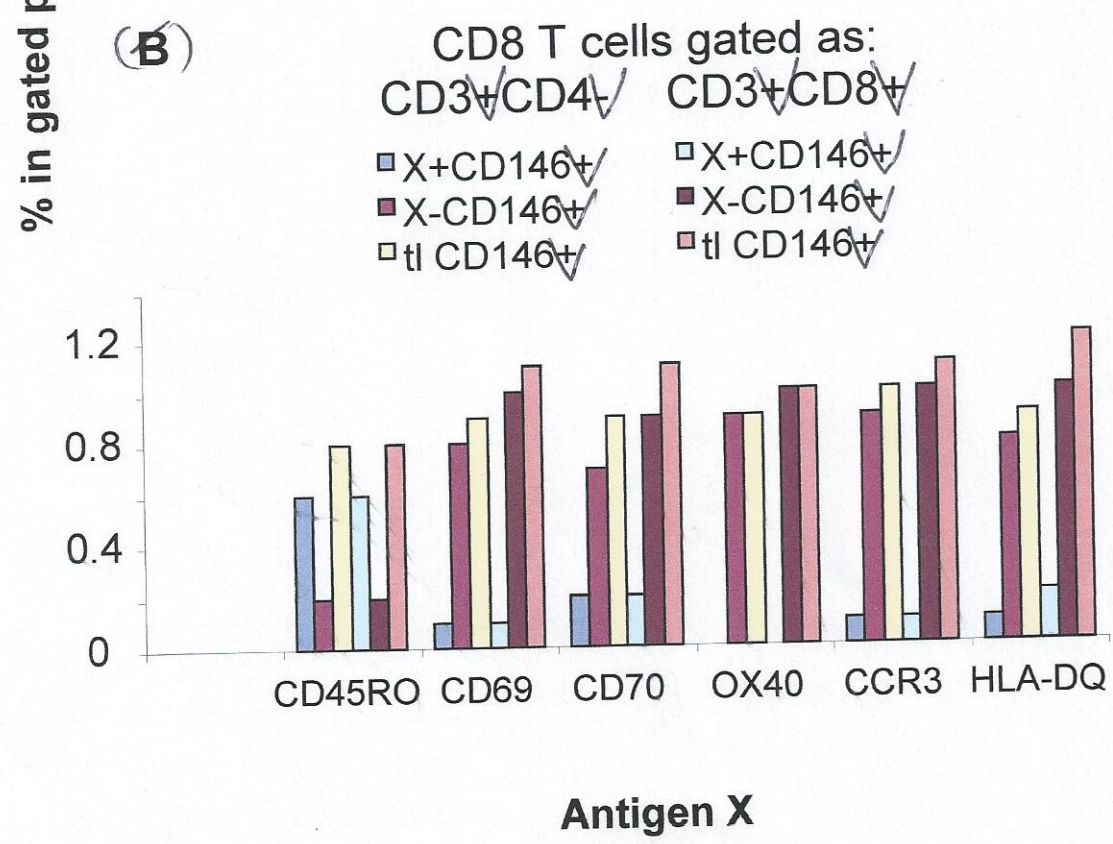

Figure S1: No effect of gating strategy on marker vs. CD146 expression in an SLE patient
