# Supplementary material
Source: PubMed Central journal article supplement (PMC3784215)
Supplement: cei0174-0073-SD3.pdf [file cei0174-0073-SD3.pdf]

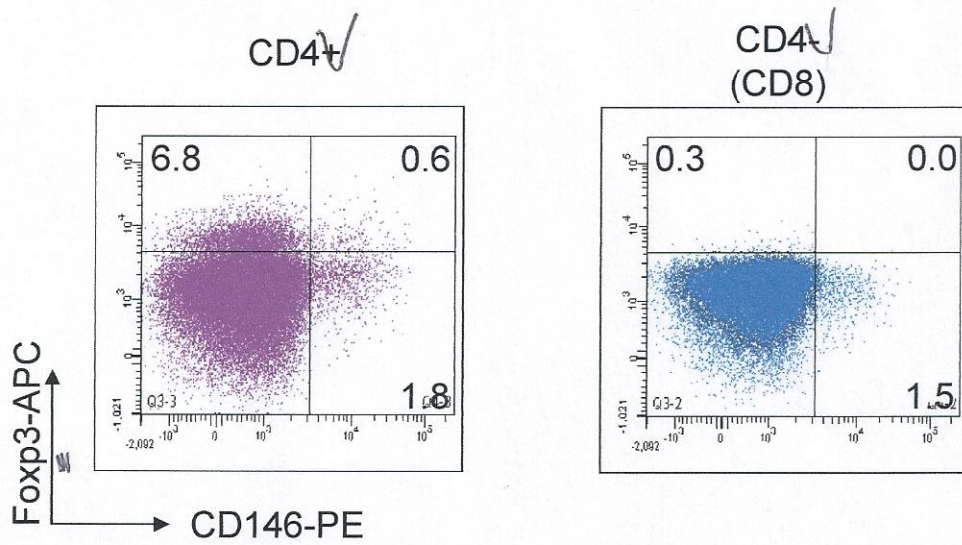

CA 12151  
19pi, 1ca.  
center-dec

Figure S3: FoxP3 vs. CD146 expression in circulating CD4 and CD8 cells from a representative HD (of 5 tested)
