# Supplementary material
Source: PubMed Central journal article supplement (PMC3784215)
Supplement: cei0174-0073-SD10.pdf [file cei0174-0073-SD10.pdf]

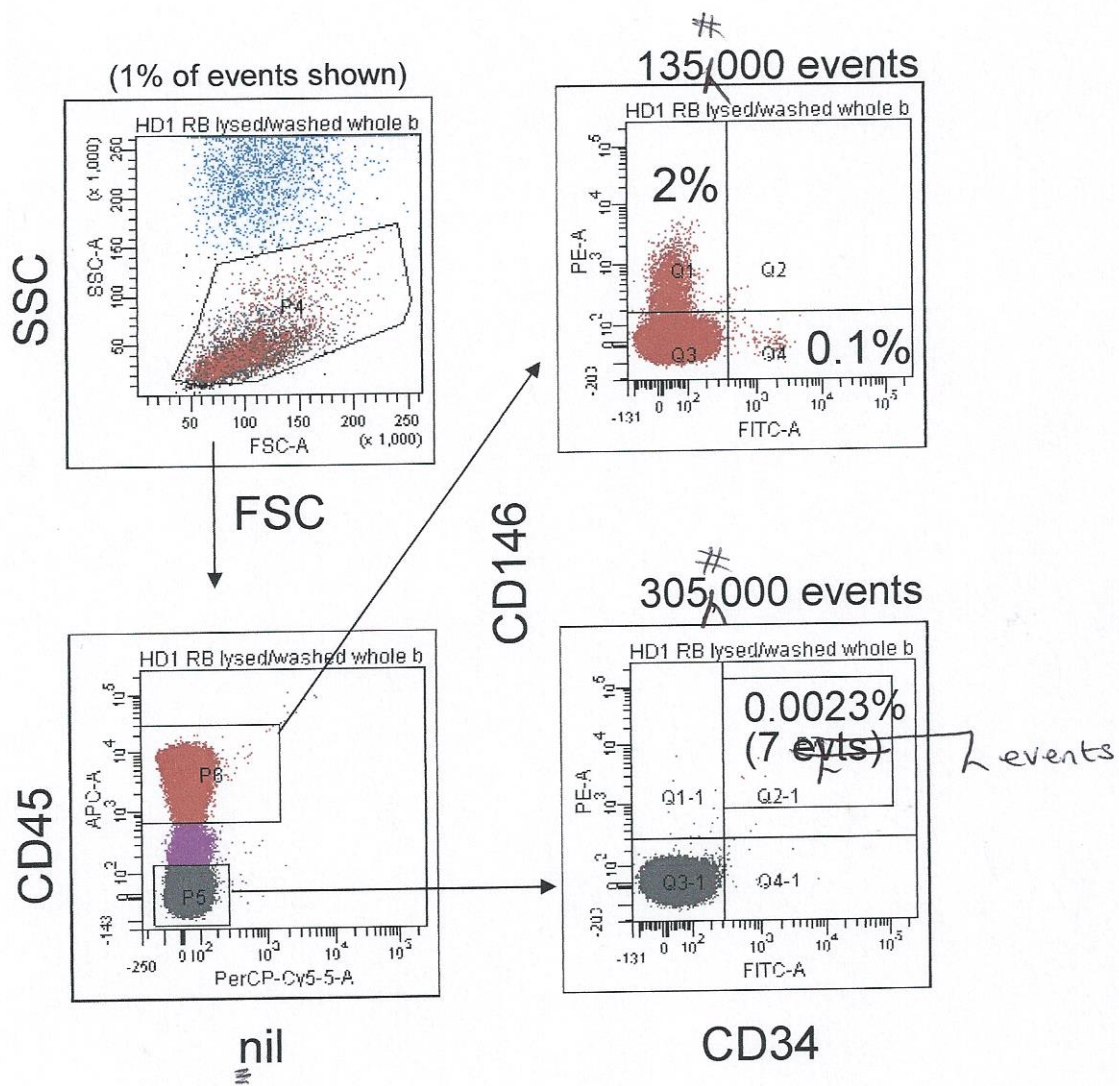

CA 12151  
 25 pi, 2/3 page  
 Cambridge

Figure S10: CD146+ lymphocytes (CD45hi, CD34neg) greatly outnumber circulating endothelial cells (CD45neg, CD34pos) in a healthy donor
