# Supplementary material
Source: PubMed Central journal article supplement (PMC3784215)
Supplement: cei0174-0073-SD11.pdf [file cei0174-0073-SD11.pdf]

**Table S1. Clinical characteristics of patients**

| Gender                                            | Age (yrs) <sup>a</sup> | CTD key features <sup>b</sup>                                                                         | Comorbidity <sup>b</sup>                                                                     | Immunomodulatory Drugs <sup>c</sup> | Serology <sup>d</sup>         | Disease Activity <sup>e</sup> | Smoking history |
|---------------------------------------------------|------------------------|-------------------------------------------------------------------------------------------------------|----------------------------------------------------------------------------------------------|-------------------------------------|-------------------------------|-------------------------------|-----------------|
| <i>Systemic lupus erythematosus</i> (SLE; n = 14) |                        |                                                                                                       |                                                                                              |                                     |                               |                               |                 |
| F                                                 | 54                     | Arthralgia, rash; SVT                                                                                 | Cushing's Disease                                                                            | HCQ                                 | ANA+, dsDNA+                  | Minimal                       | Ex-smoker       |
| F                                                 | 35                     | Autoimmune liver disease, rash, pleurisy, lymphadenopathy                                             | None                                                                                         | HCQ, MMF, Pred <10mg                | ANA+, ACL+ (IgM)              | Minimal                       | Current smoker  |
| F                                                 | 60                     | Sicca symptoms                                                                                        | Osteopaenia                                                                                  | HCQ                                 | ANA+, Ro+                     | Minimal                       | Ex-smoker       |
| F                                                 | 70                     | Arthralgia, chronic renal impairment, anaemia                                                         | Hypothyroidism<br>Hypercholesterolaemia<br>Ischaemic heart disease<br>Hypertension<br>Asthma | HCQ, atorvastatin, aspirin          | ANA+, dsDNA+                  | Minimal                       | Never           |
| F                                                 | 58                     | Synovitis and pleurisy                                                                                | Osteoarthritis                                                                               | MTX. HCQ                            | ANA+, dsDNA+                  | Minimal                       | Never           |
| F                                                 | 49                     | Bipolar disorder, RP                                                                                  | IgA deficiency; Migraine                                                                     | MMF,                                | Neg                           | Moderate                      | Current smoker  |
| F                                                 | 47                     | Cerebellar ataxia, pleurisy, polyarthralgia, alopecia                                                 | Ischaemic heart disease, Hypertension, Sicca symptoms,                                       | AZA, HCQ, Pred <10mg                | Neg                           | Moderate                      | Ex-smoker       |
| F                                                 | 25                     | Nephritis, RP, malar rash, polyarthralgia                                                             | Migraines,                                                                                   | MMF, HCQ, Pred 10mg, aspirin        | ANA +, dsDNA+, Ro+, La+, ACL+ | Minimal                       | Current smoker  |
| F                                                 | 46                     | Polyarthralgia, tremor                                                                                | Macular degeneration, Hypercholesterolaemia                                                  | AZA                                 | Neg                           | Minimal                       | Ex-smoker       |
| F                                                 | 27                     | malar rash, photosensitivity, mouth ulcers, skin ulceration, livedo reticularis                       | Asthma                                                                                       | HCQ                                 | ANA+, dsDNA+                  | Moderate                      | Ex-smoker       |
| F                                                 | 41                     | Migraines, RP                                                                                         | HT                                                                                           | HCQ                                 | ANA+                          | Minimal                       | Never           |
| F                                                 | 50                     | Tenosynovitis, sicca symptoms, phototsensitivity, alopecia                                            | Ehlers-Danlos Syndrome, proptosis, hypercholesterol aemia                                    | HCQ; atorvastatin                   | RhF+, CCP+                    | Moderate                      | Smoker          |
| F                                                 | 52                     | Cerebral infarction, palpitations, polyarthralgia, mouth ulcers, rash, alopecia, cognitive impairment | Mucinous adenocarcinoma of appx resected                                                     | HCQ, aspirin, warfarin              | Neg                           | Minimal                       | Never           |
| M                                                 | 27                     | Oropharyngeal ulceration, autoimmune liver                                                            |                                                                                              | HCQ, MMF                            | Neg                           | Moderate                      | Never           |

|                                                       |                       |                                                                                                           |                                                                |                                    |                                          |                            |                              |
|-------------------------------------------------------|-----------------------|-----------------------------------------------------------------------------------------------------------|----------------------------------------------------------------|------------------------------------|------------------------------------------|----------------------------|------------------------------|
|                                                       |                       | disease, synovitis, RP, pleurisy                                                                          |                                                                |                                    |                                          |                            |                              |
| <b>13/14 (93%) F</b>                                  | <b>48 (36.5-53.5)</b> |                                                                                                           |                                                                | <b>7/14 (50%) immunosuppressed</b> | <b>8/14 (57%) ANA+</b>                   | <b>5/14 (36%) moderate</b> | <b>9/14 (64%) smoking Hx</b> |
| <b><u>Systemic sclerosis</u> (SSc; n = 5)</b>         |                       |                                                                                                           |                                                                |                                    |                                          |                            |                              |
| F                                                     | 56                    | <b>lcSSc</b> ; Calcinosis, sclerodactyly, RP; digital ulcers                                              | HT                                                             | None                               | ANA+, CENP+                              | Moderate                   | Never                        |
| M                                                     | 63                    | <b>dcSSc</b> ; Scleroderma, skin ulcers                                                                   | HT; hypercholesterol aemia, AF                                 | simvastatin                        | Neg                                      | None                       | Ex-smoker                    |
| F                                                     | 50                    | <b>dcSSc</b> ; ILD, myositis, malabsorption                                                               |                                                                | MMF, Pred < 10mg                   | ANA+                                     | Minimal                    | Never                        |
| F                                                     | 81                    | <b>lcSSc</b> ; GORD, ILD (NSIP), PAH, RP, sicca symptoms                                                  | CKD, HT, OA                                                    | None                               | ANA+                                     | Minimal                    | Never                        |
| F                                                     | 70                    | <b>lcSSc</b> ; Sclerodactyly, ILD                                                                         | Arteriopathy                                                   | Aspirin, Pravastatin               | ANA+, CENP+                              | Moderate                   | Ex-smoker                    |
| <b>4/5 (80%) F</b>                                    | <b>63 (56-70)</b>     | <b>2/5 (40%) dcSSc</b>                                                                                    |                                                                | <b>1/5 (20%) immunosuppressed</b>  | <b>4/5 (80%) seropositive</b>            | <b>2/5 (40%) moderate</b>  | <b>2/5 (40%) smoking Hx</b>  |
| <b><u>Primary Sjögren's syndrome</u> (pSS; n = 7)</b> |                       |                                                                                                           |                                                                |                                    |                                          |                            |                              |
| F                                                     | 59                    | Parotid swelling, sicca symptoms, Retinal infarct                                                         | HT                                                             | None                               | RhF+, ANA+, Ro+, La+                     | Moderate                   | Ex-smoker                    |
| F                                                     | 54                    | MSG Bx+, , sicca symptoms; objective KCS, synovitis                                                       | Hypertension, LVH, Thin GBM disease                            | MTX                                | Neg                                      | Moderate                   | Ex-smoker                    |
| F                                                     | 63                    | Sicca symptoms and signs, MSG Bx +ve                                                                      | Hypertension, hypothyroidism                                   | HCQ                                | ANA+, Ro+                                | Minimal                    | Ex-smoker                    |
| F                                                     | 66                    | Submandibular and parotid gland swelling, sicca symptoms, objective KCS, synovitis, Raynaud's, ILD, GORD, | OP Bronchiectasis                                              | LEF (2 weeks only)                 | ANA+ Ro+                                 | Moderate                   | Never                        |
| F                                                     | 58                    | Objective KCS, MSG Bx +ve, Polyarthralgia                                                                 | Breast Ca 1988 Hyperthyroidism Hypertension Migraine Psoriasis | HCQ                                | ANA+, Ro+, RhF+                          | Minimal                    | Never                        |
| F                                                     | 58                    | Parotid gland swelling, Sicca symptoms, Objective KCS, polyarthralgia                                     | Hx of TB Vitamin B12 deficiency                                | HCQ                                | ANA+, Ro+, RhF+, ACL IgM+, beta2GP1 IgM+ | Minimal                    | Never                        |

|                                                    |                                |                                                                                                                                                  |                                                                                |                                       |                                    |                               |                                 |
|----------------------------------------------------|--------------------------------|--------------------------------------------------------------------------------------------------------------------------------------------------|--------------------------------------------------------------------------------|---------------------------------------|------------------------------------|-------------------------------|---------------------------------|
| F                                                  | 60                             | Sicca symptoms,<br>Objective KCS;<br>ILD-UIP, RP                                                                                                 | PBC                                                                            | HCQ                                   | ANA+, Ro+                          | Minimal                       | Never                           |
| <b>7/7<br/>(100%)<br/>F</b>                        | <b>59.7<br/>(58-<br/>61.5)</b> |                                                                                                                                                  |                                                                                | <b>2/7 (29%)<br/>immunosuppressed</b> | <b>6/7 (86%)<br/>seropositive</b>  | <b>3/7 (43%)<br/>moderate</b> | <b>3/7 (43%)<br/>smoking Hx</b> |
| <b><i>Secondary Sjögren's syndrome</i></b> (n = 5) |                                |                                                                                                                                                  |                                                                                |                                       |                                    |                               |                                 |
| F                                                  | 56                             | <b>SSc/2ry SS</b> ,<br>Sclerodactyly,<br>calcinosis, GORD,<br>RP, Alopecia,<br>ILD-UIP                                                           | Hypothyroidism                                                                 | HCQ, Pravastatin                      | ANA+, Ro+,<br>La+, Scl-70+         | Minimal                       | Ex-smoker                       |
| F                                                  | 46                             | <b>SLE/2ry SS</b> , sicca<br>symptoms, ILD-<br>LIP,<br>hyperviscosity                                                                            |                                                                                | RTX, MMF, Aspirin,<br>Pred < 10mg     | ANA+,<br>dsDNA+, U1-<br>RNP+, RhF+ | Minimal                       | Ex-smoker                       |
| F                                                  | 60                             | <b>SLE/2ry SS</b> ,<br>Erosive<br>Inflammatory<br>acromioclavicular<br>arthritis,<br>mucocutaneous<br>ulcers, sicca<br>symptoms,<br>sialadenitis | Hypertension,<br>Ischaemic heart<br>disease,<br>Hypercholeste-<br>ro<br>laemia | HCQ, Aspirin                          | Neg                                | Minimal                       | Never                           |
| F                                                  | 57                             | <b>SLE/2ry SS</b> ,<br>polyarthralgia,<br>myalgia,<br>photosensitivity,<br>rashes, mouth<br>ulcers                                               | Migraines,                                                                     | HCQ                                   | ANA+, Ro+,<br>La+, CENP+           | Moderate                      | Never                           |
| F                                                  | 42                             | <b>SLE/SSc/2ry SS</b> ,<br>Calcinosis;<br>sclerodactyly;<br>GORD, RP; livedo<br>reticularis,                                                     | Atrial<br>arrhythmia,<br>migraines                                             | MMF, HCQ                              | ANA+, CENP+                        | Moderate                      | Never                           |
| <b>5/5<br/>(100%)<br/>F</b>                        | <b>56<br/>(46-<br/>57)</b>     |                                                                                                                                                  |                                                                                | <b>2/5 (40%)<br/>immunosuppressed</b> | <b>4/5 (80%)<br/>seropositive</b>  | <b>2/5 (40%)<br/>moderate</b> | <b>2/5 (40%)<br/>smoking Hx</b> |

<sup>a</sup> Summary statistics: median and (for n > 4) IQR.

<sup>b</sup> Abbreviations of clinical features: SVT: Supraventricular tachycardia; RP: Raynaud's Phenomenon; ILD: Interstitial lung disease; UIP: Usual Interstitial Pneumonia; NSIP: Non-specific Interstitial Pneumonia; LIP: Lymphocytic Interstitial Pneumonia; GORD: Gastro-oesophageal Reflux Disease; PAH: Pulmonary Arterial Hypertension; KCS: keratoconjunctivitis sicca; MSG Bx: minor salivary gland biopsy. Summary statistics for SSc report the percentage of patients with diffuse cutaneous (dc) SSc; the other SSc patients had limited cutaneous (lc) disease. For patients with overlap syndromes, the primary diagnosis is given in bold type.

<sup>c</sup> Drug abbreviations: HCQ: Hydroxychloroquine; MMF: Mycophenolate Mofetil; MTX: Methotrexate; Pred: Prednisolone; AZA: Azathioprine; RTX: Rituximab. Summary statistics report the percentage of patients on antiproliferatives (AZA, MMF, MTX), biologics (RTX), or corticosteroids (Pred), separately or in combination.

<sup>d</sup> Autoantibody abbreviations: ANA: Anti-nuclear antibody; dsDNA: Anti-double strand DNA antibody; ACL: Anti-cardiolipin antibody; RhF: Rheumatoid Factor; CCP: Anti-Cyclic Citrullinated Peptide antibody; CENP: Anti-Centromere Protein antibody; U1RNP: Anti-U1 small nuclear Ribonucleoprotein

antibody; Scl-70: Anti-topoisomerase I antibody; Neg: Negative for all autoantibodies tested. Summary statistics report the percentage of seropositive patients (ANA+ for SLE).

<sup>e</sup> Disease activity was assessed by review of clinical notes and letters by a consultant rheumatologist who was, at the time of review, blinded to the flow cytometric results (F.C.H.). Summary statistics report the percentage of those with greater than minimal disease activity.
