# Supplementary material
Source: PubMed Central journal article supplement (PMC3784215)

Figure S2. No effect of freeze/thaw on T-cell phenotypes (CD45RO vs. CD146 expression)

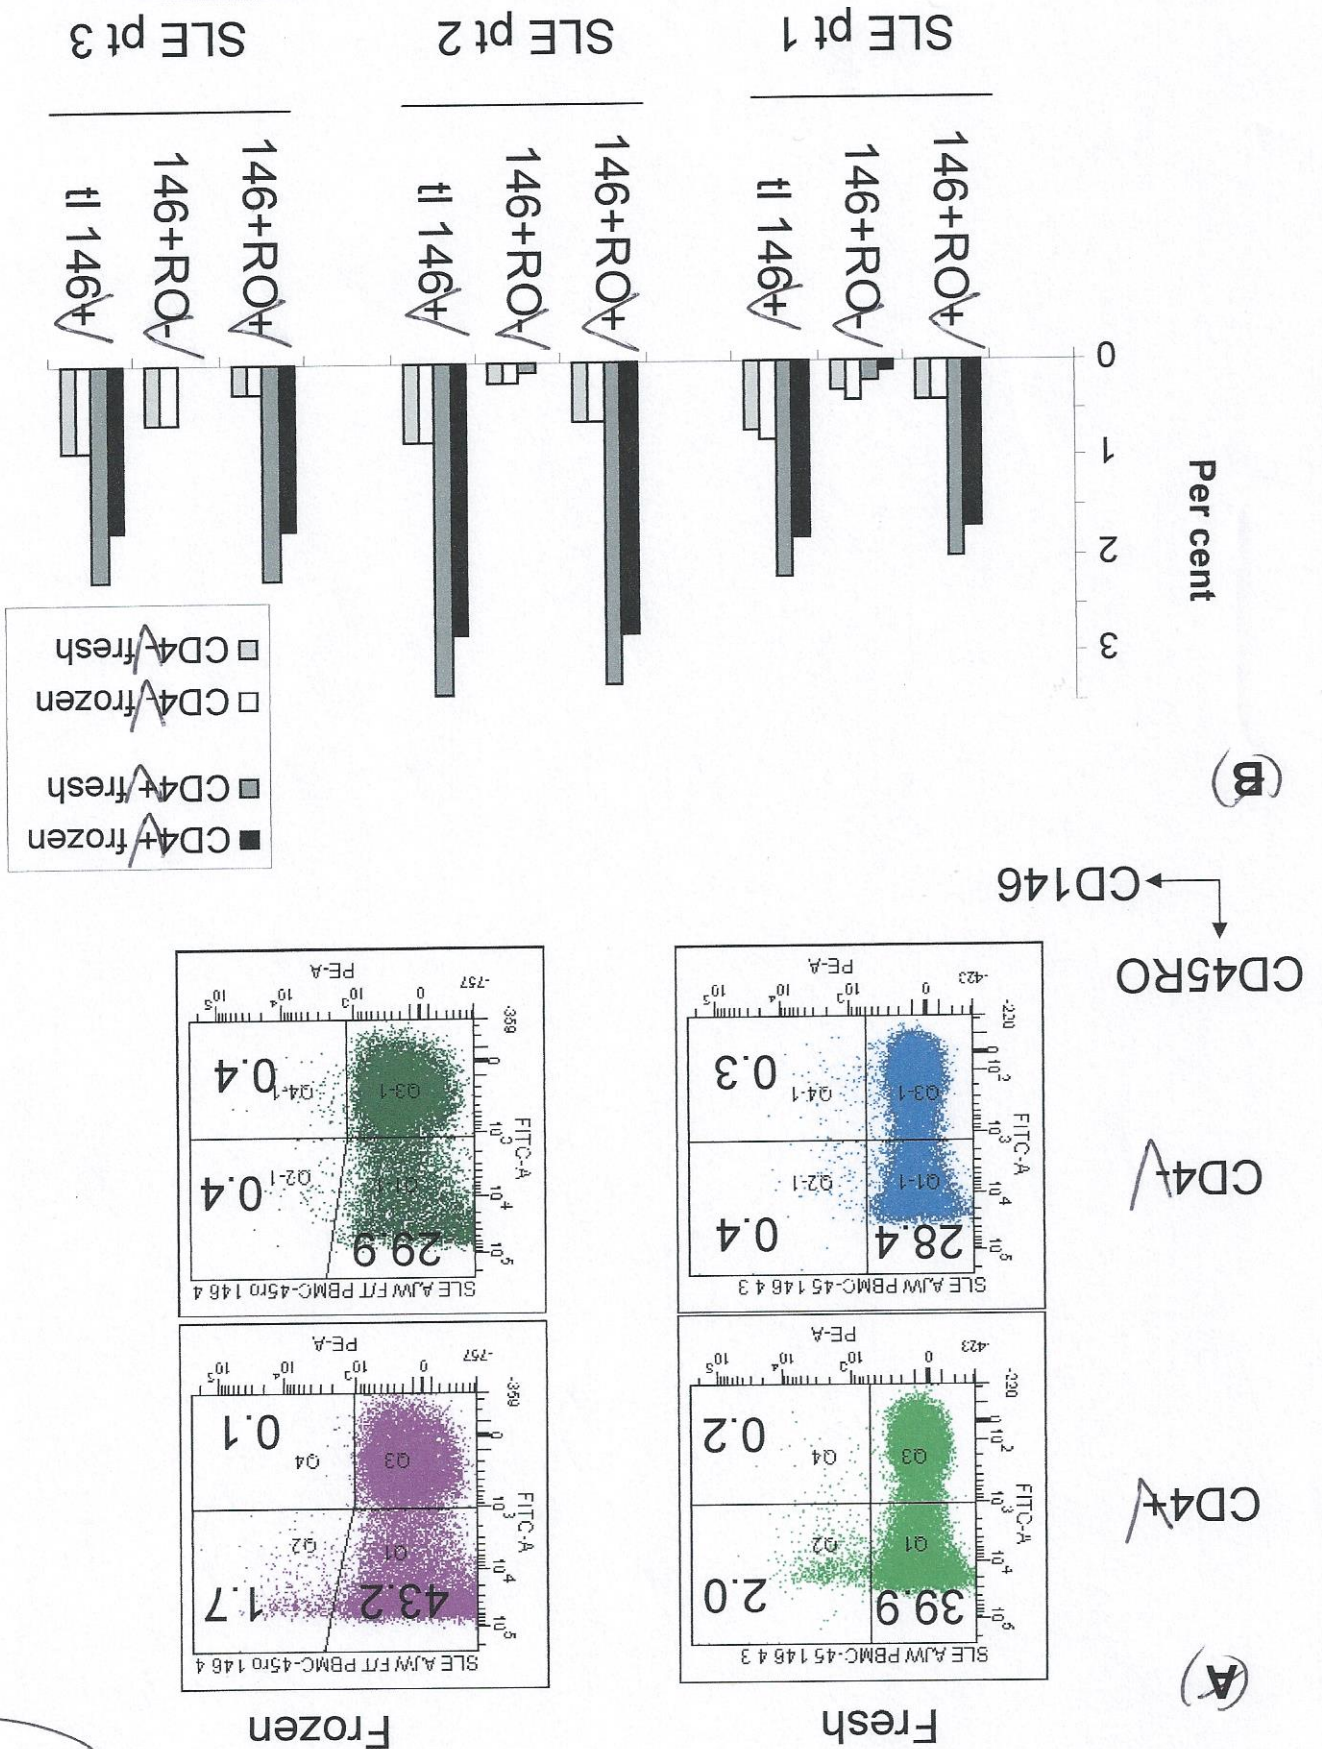

ca rasi  
25m 3/age  
ca rader

Supplement: cei0174-0073-SD2.pdf [file cei0174-0073-SD2.pdf]

CD12151  
25 p, 25 page  
emr-deu

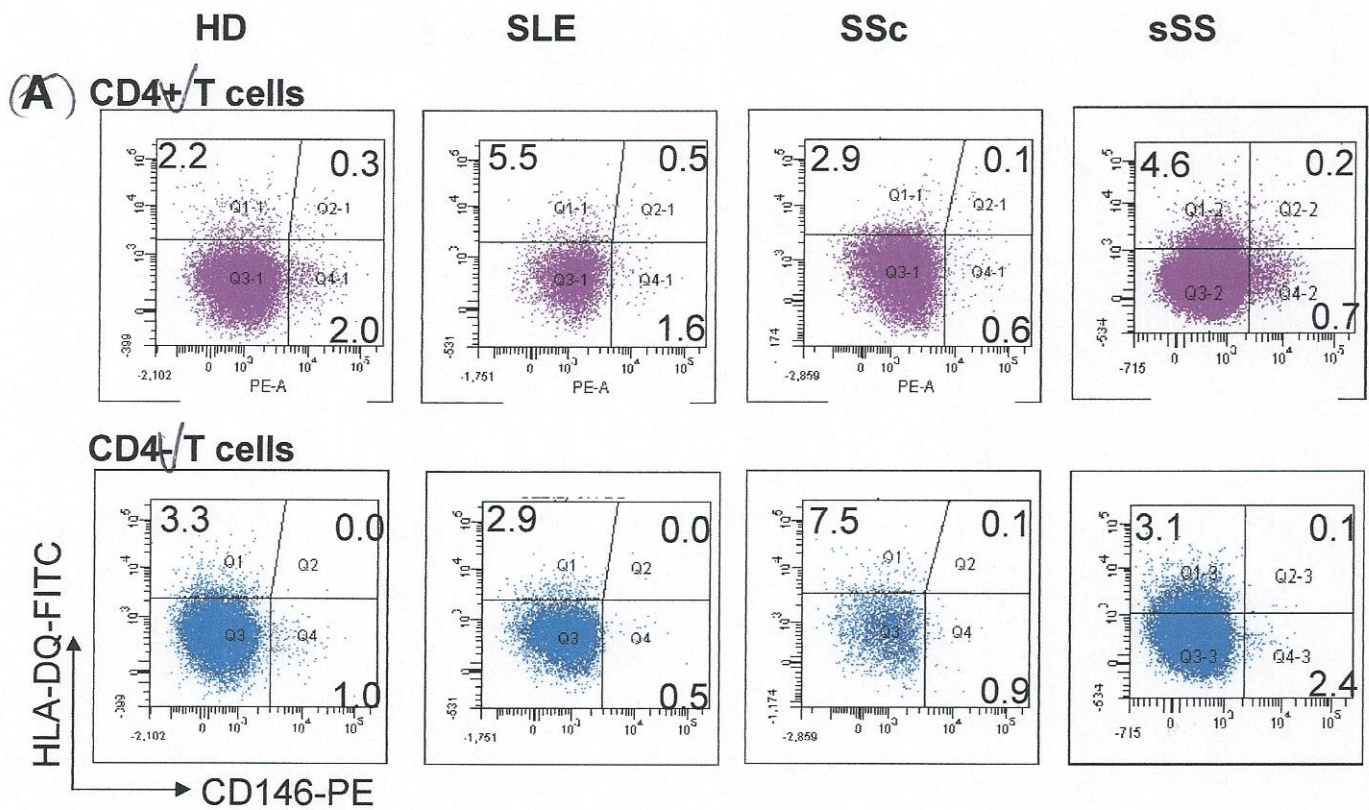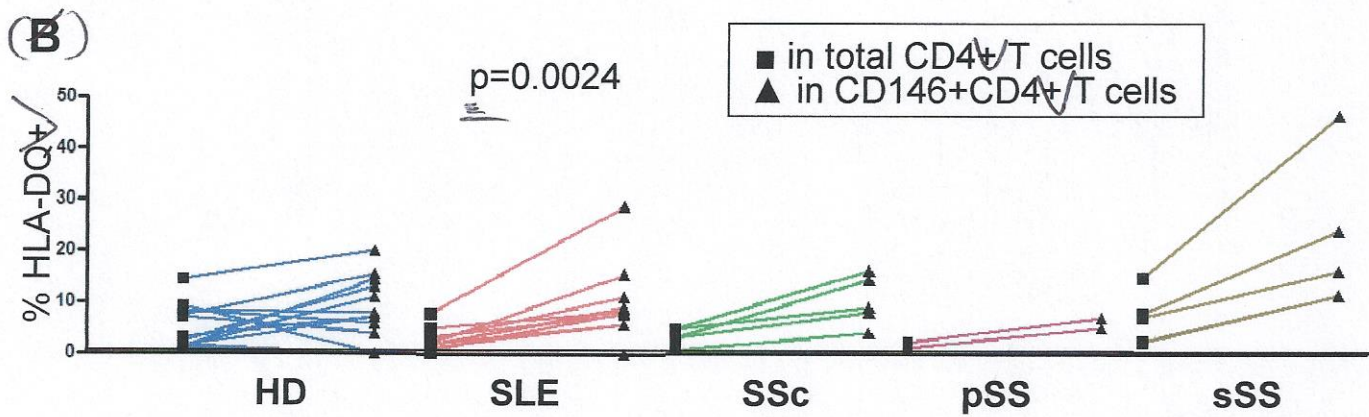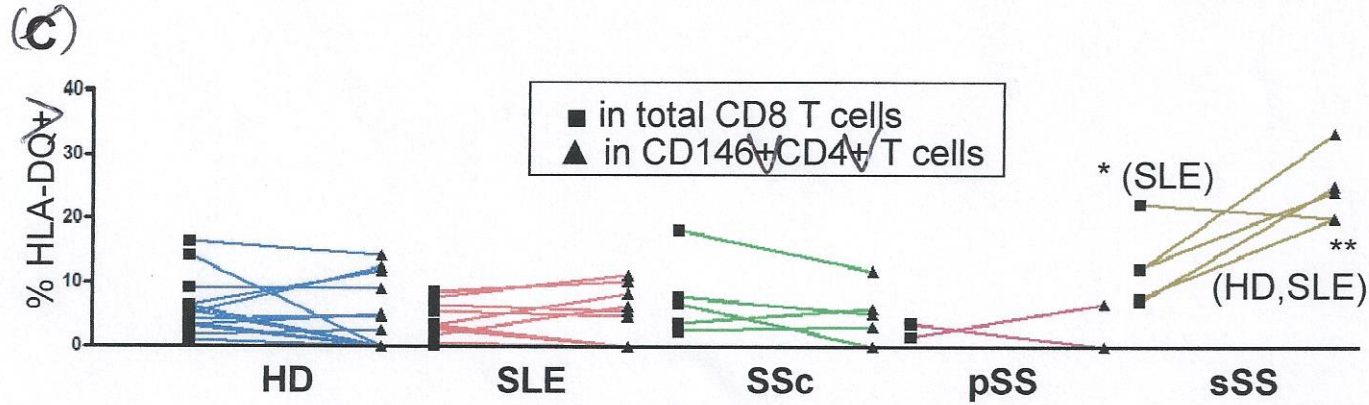

Figure S4: HLA-DQ vs. CD146 in HDs and CTD patients

Supplement: cei0174-0073-SD4.pdf [file cei0174-0073-SD4.pdf]

CD 12151  
25 of 23 page  
center den

(A)

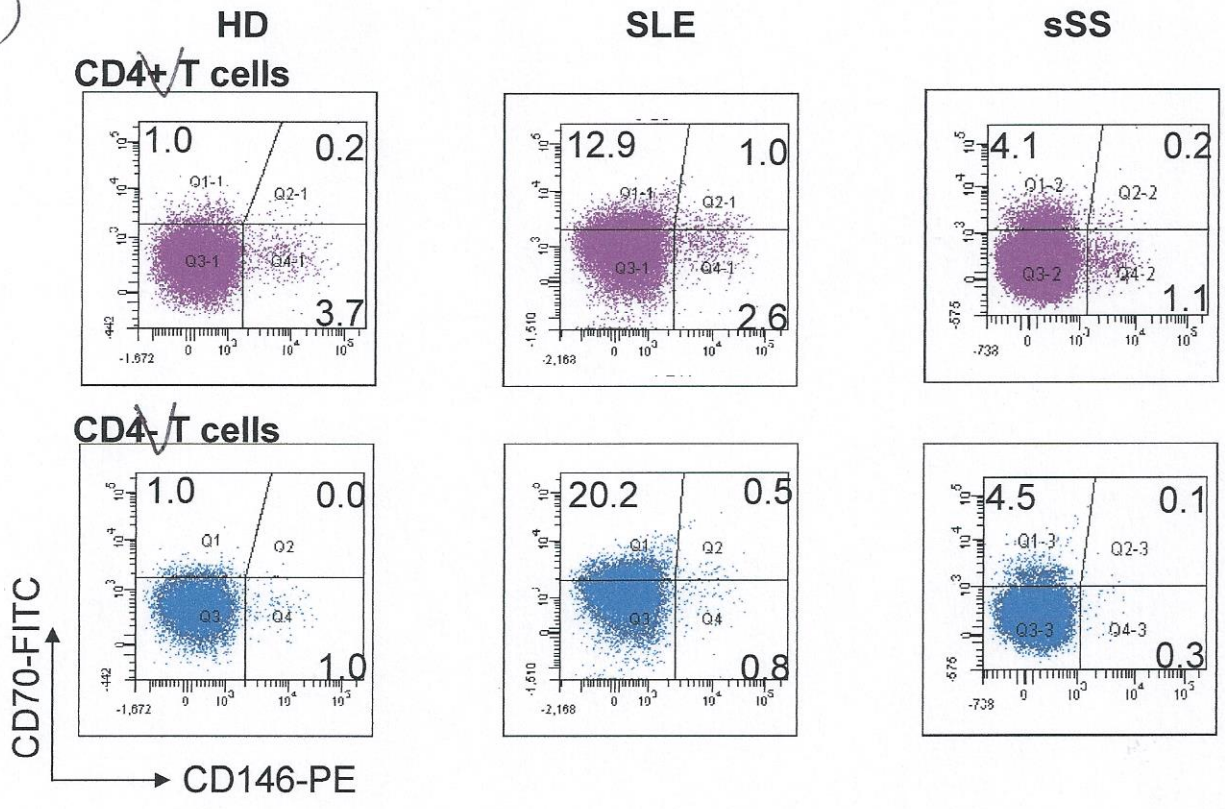

(B)

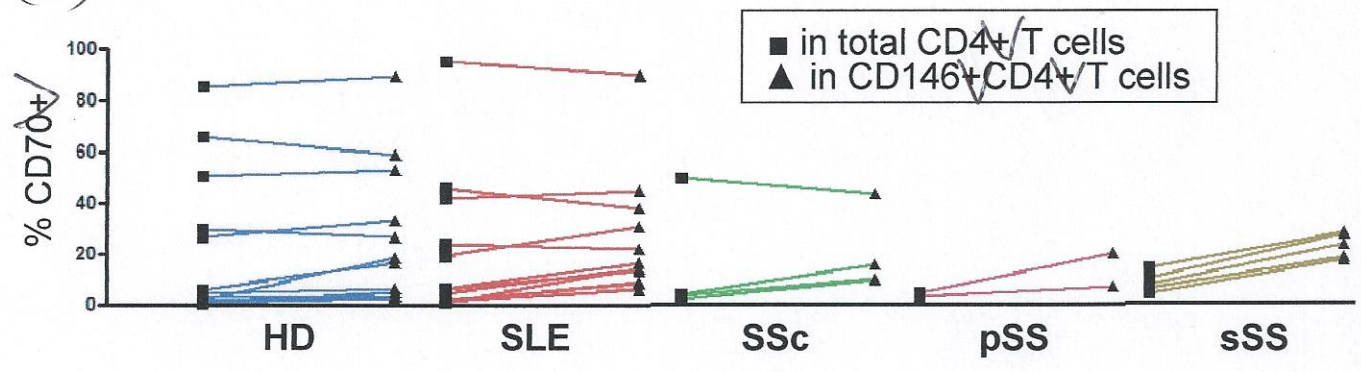

(C)

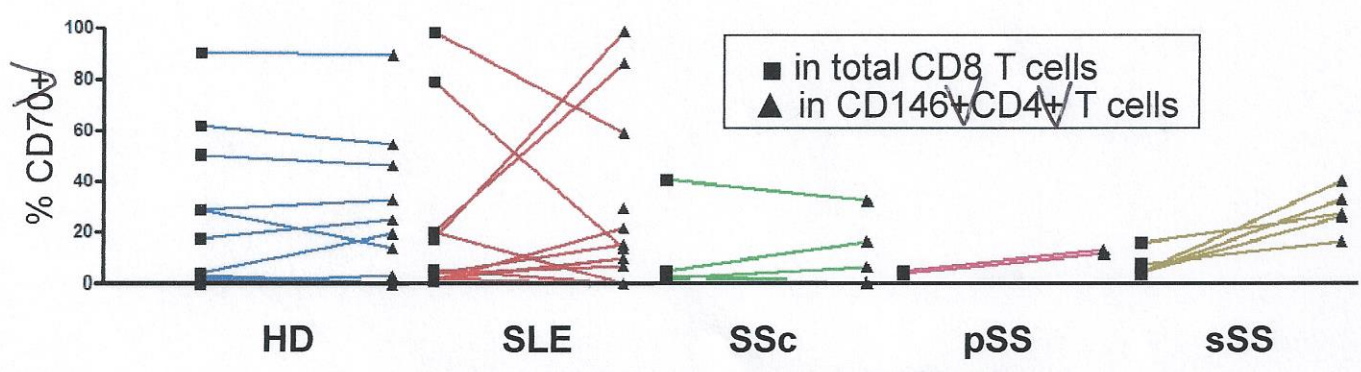

Figure S5: CD70 vs. CD146 in HDs and CTD patients

Supplement: cei0174-0073-SD5.pdf [file cei0174-0073-SD5.pdf]

Figure S6: CD45RA vs. CD146 in HDS vs. SLE patients

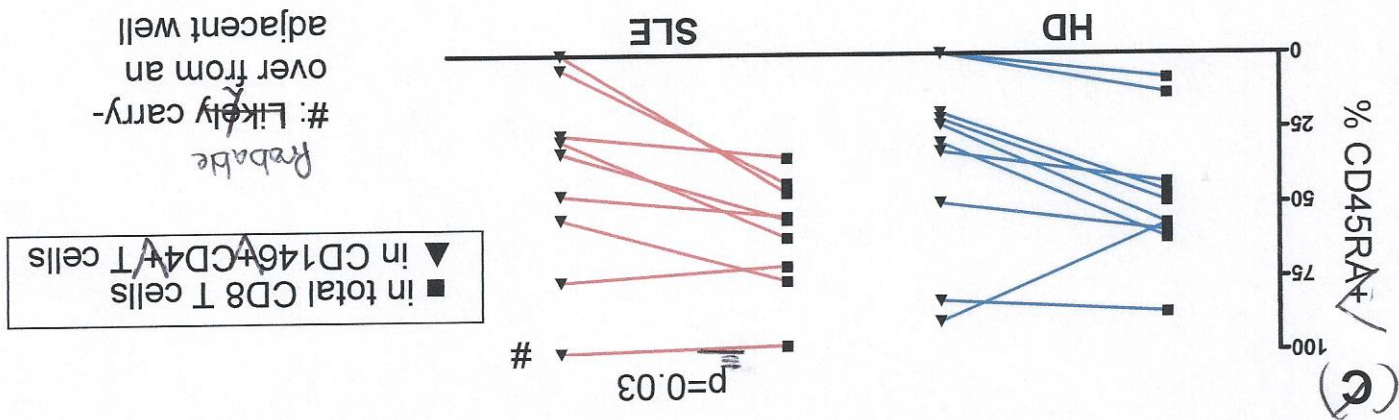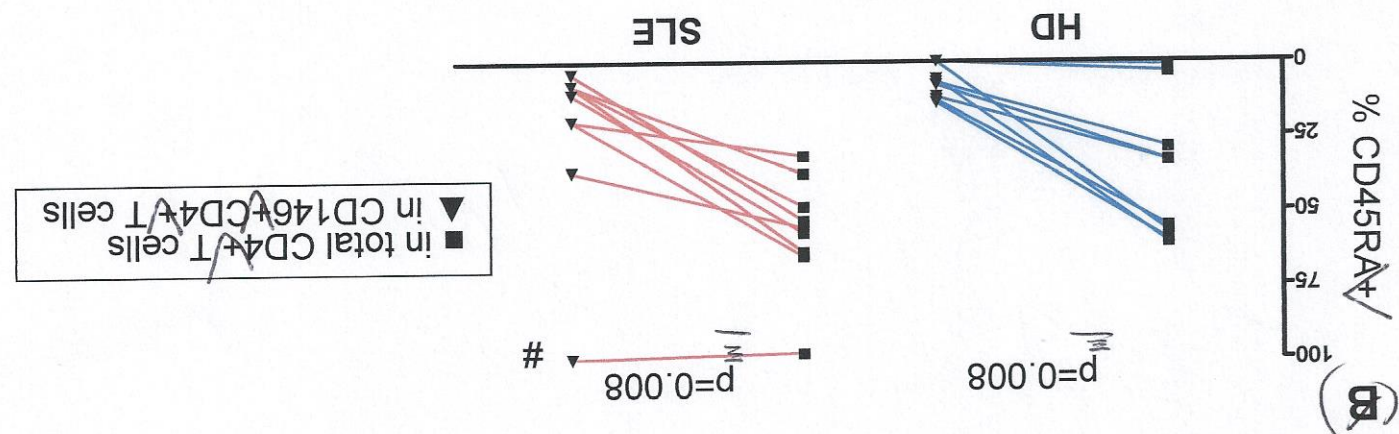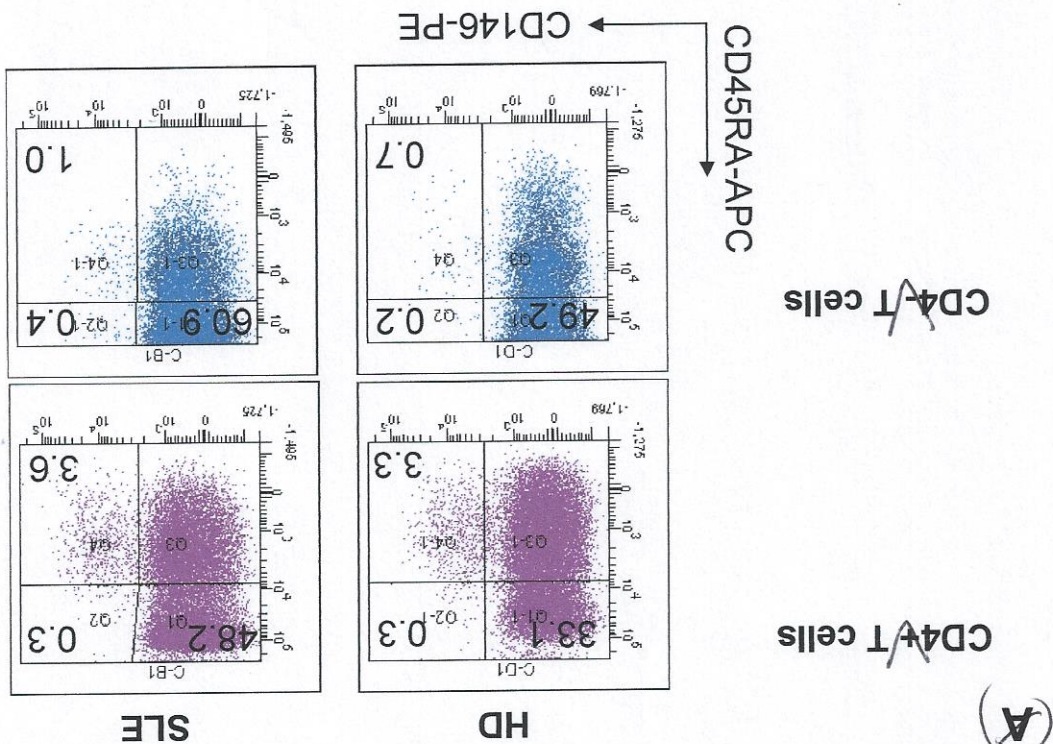

CA 12151  
25 pgs page  
continued

Supplement: cei0174-0073-SD6.pdf [file cei0174-0073-SD6.pdf]

Figure S7: CXCR3 vs. CD146 in HDS vs. SLE patients

CA 12157  
1983/162

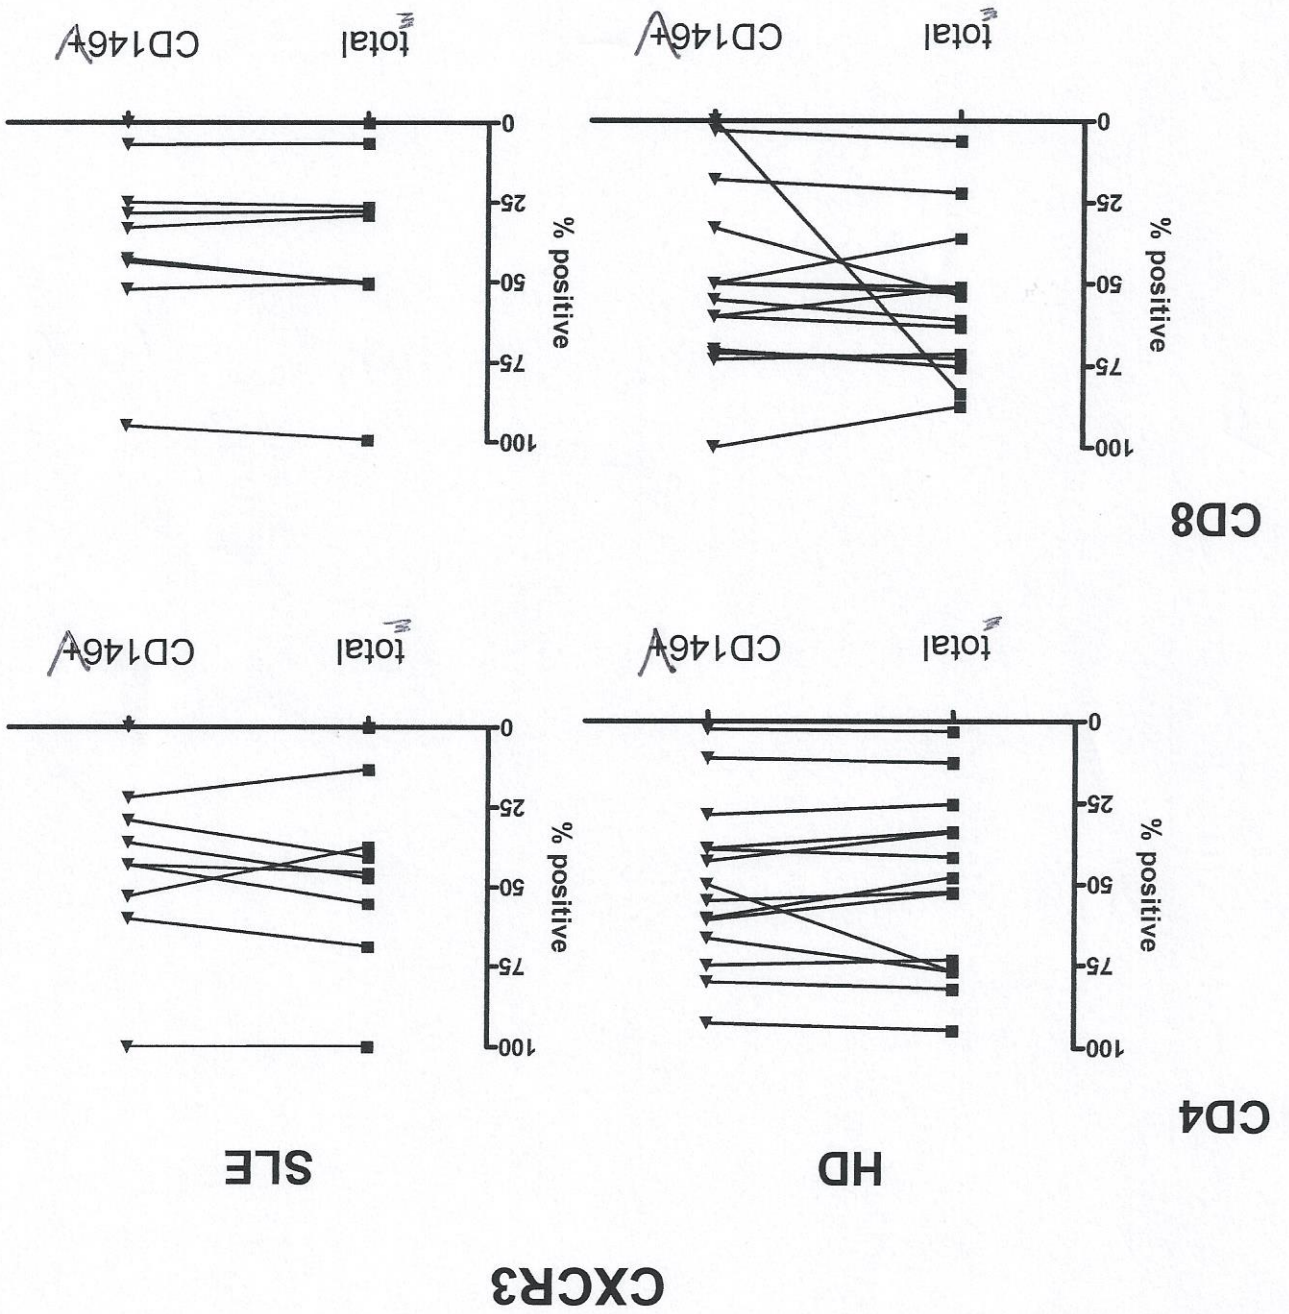

Supplement: cei0174-0073-SD7.pdf [file cei0174-0073-SD7.pdf]

Figure S8: CD31 vs. CD146 in HDs and CTD patients

CA 12151  
25 p. 3 page  
carm-dec

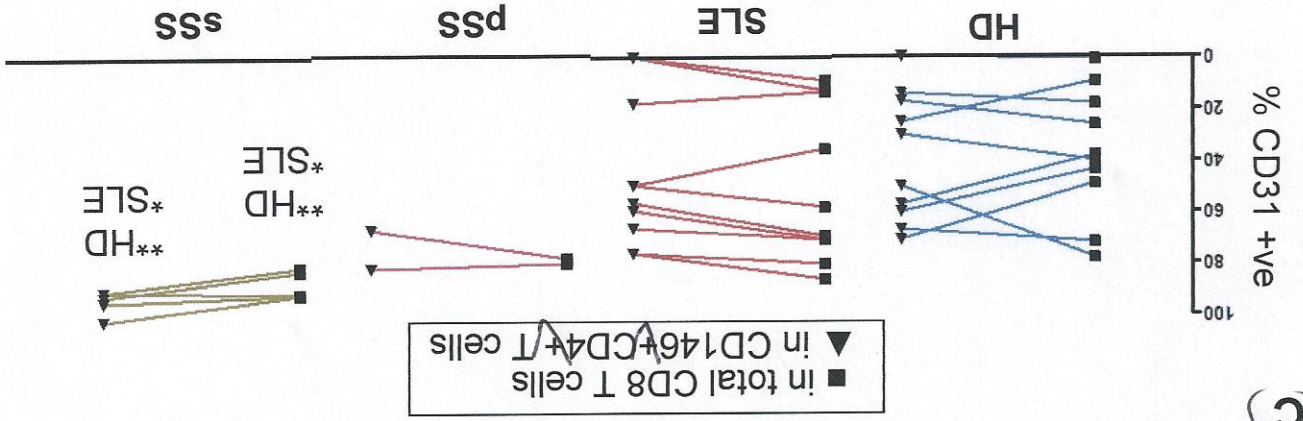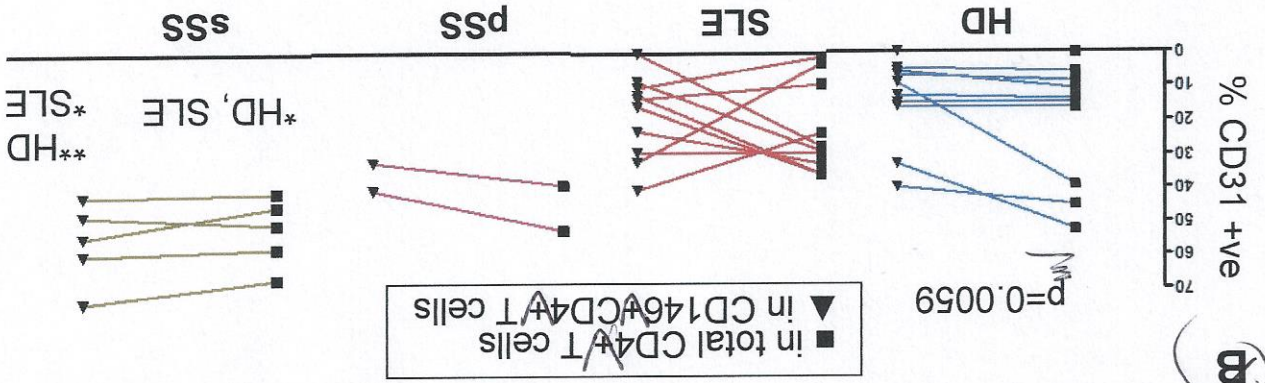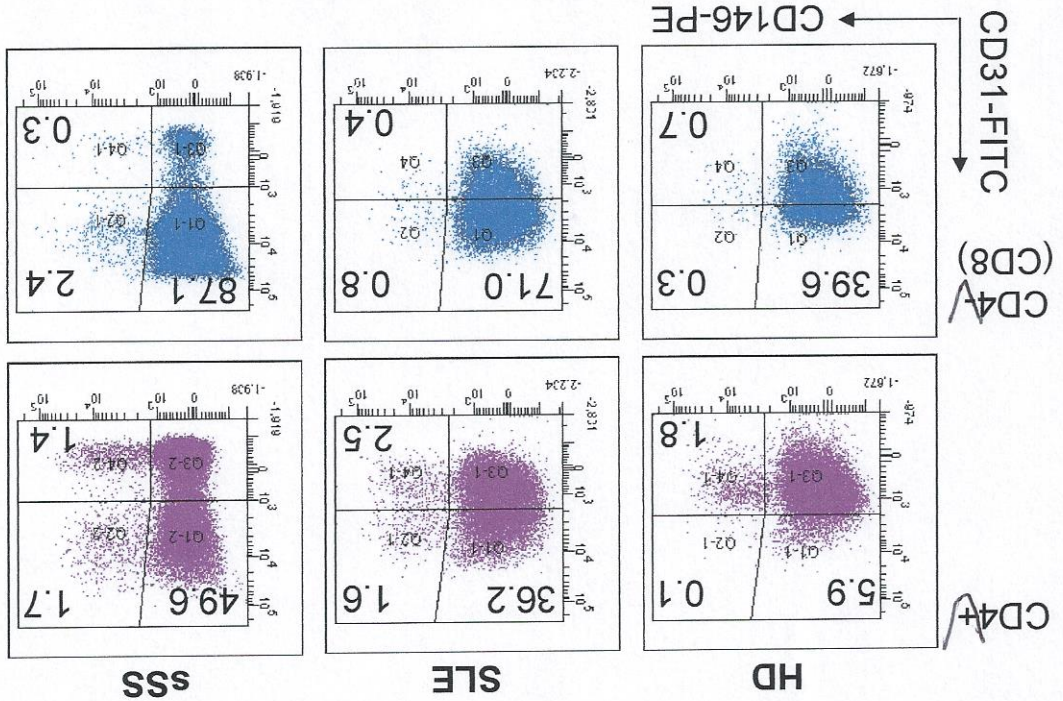

Supplement: cei0174-0073-SD8.pdf [file cei0174-0073-SD8.pdf]

Figure S9: CD54 vs. CD146 in HD vs. SLE

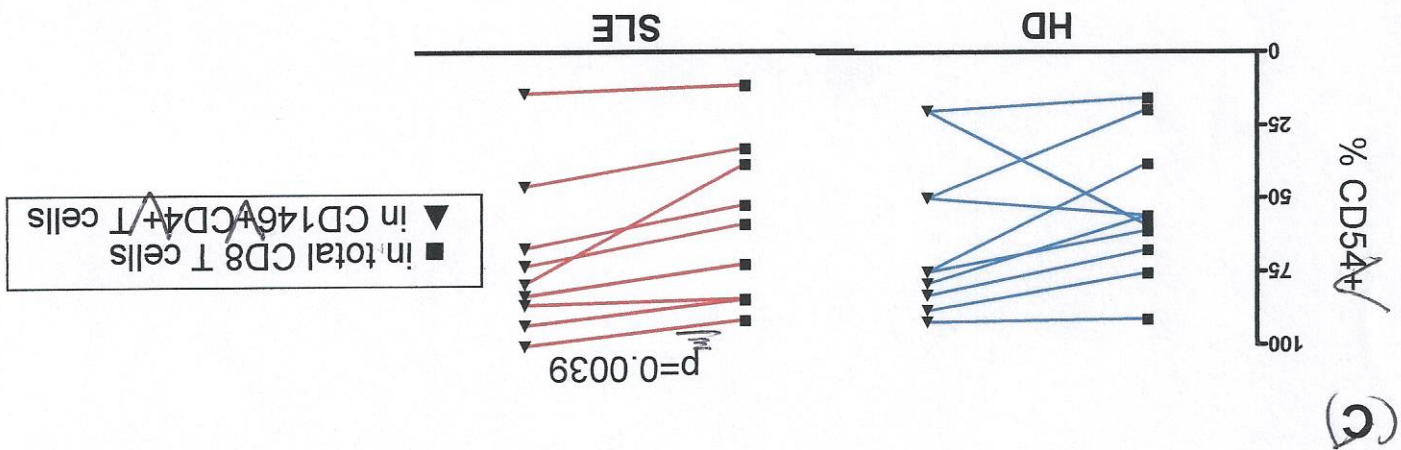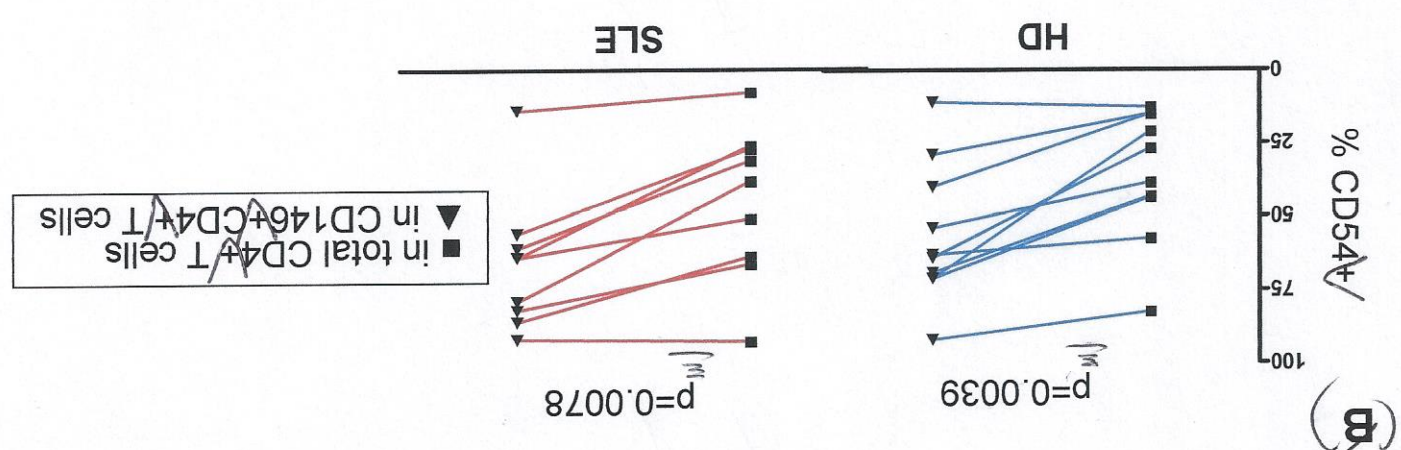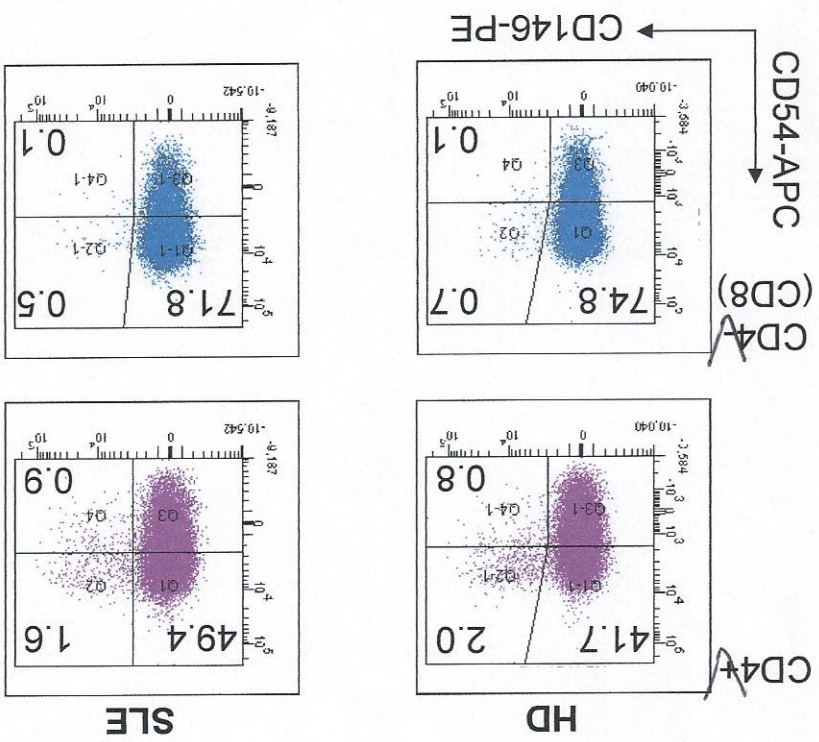

CEI 12151  
 25 pgs page  
 Carner deti

Supplement: cei0174-0073-SD9.pdf [file cei0174-0073-SD9.pdf]
